# Supplementary material for: Resveratrol Supplementation Attenuates Cognitive and Molecular Alterations under Maternal High-Fat Diet Intake: Epigenetic Inheritance over Generations
Source: PubMed Central journal article supplement (PMC7867164; doi:10.3390/ijms22031453), 2021-02-01
Supplement: ijms-22-01453-s001.pdf [file ijms-22-01453-s001.pdf]

**Table 1.** Antibodies used in Western blot studies.

| <b>Antibody</b>                            | <b>Host</b> | <b>Source/Catalog</b> | <b>WB dilution</b> |
|--------------------------------------------|-------------|-----------------------|--------------------|
| <b>BDNF</b>                                | Rabbit      | Santa Cruz/sc-20981   | 1:1000             |
| <b>p-Akt (S473) (D9E)</b>                  | Rabbit      | Cell signaling/#4060  | 1:1000             |
| <b>Akt</b>                                 | Rabbit      | Cell signaling/#9272  | 1:1000             |
| <b>GAPDH</b>                               | Mouse       | Millipore/MAB374      | 1:2000             |
| <b>Goat-anti-mouse HRP<br/>conjugated</b>  |             | BioRad/170-5047       | 1:2000             |
| <b>Goat-anti-rabbit HRP<br/>conjugated</b> |             | BioRad/170-6515       | 1:2000             |

**Table 2.** Primers used in qPCR studies.

| <b>Target</b>                   | <b>Forward primer (5'-3')</b>  | <b>Reverse primer (5'-3')</b> |
|---------------------------------|--------------------------------|-------------------------------|
| <i>Cxcl-10</i>                  | GGCTAGTCCTAATTGCCCTTGG         | TTGTCTCAGGACCATGGCTTG         |
| <i>Dnmt1</i>                    | ACCTGGAGAGCAGAAATGGC           | TGAAAGGGTGTCACTGTCCG          |
| <i>Dnmt3a</i>                   | GAGCCGCCTGAAGCCC               | TCTTCCTTGCCACGGTTCTC          |
| <i>Dnmt3b</i>                   | TGCCAGACCTTGGAACCTC            | GCTGGCACCTCTTCTTCAT           |
| <i>Fto</i>                      | GACACTTGGCTTCCTTACCTG          | CTCACCACGTCCCGAAACAA          |
| <i>Mettl3</i>                   | TTAGCATCTGGTCTGGCCTCTT         | TGACCTTCTTGCTCTGCTGTTC        |
| <i>Mcp1</i>                     | CCCACTCACCTGCTGCTACT           | TCTGGACCCATTCTTCTTG           |
| <i>Ngf</i>                      | GGAGCGCATCGAGTGACTT            | CCTCACTGCGGCCACTATAG          |
| <i>Nt3</i>                      | CAGGGTGAAGGGGAAACT             | AGTTCGGTCATTCACTCTCGC         |
| <i>Il-1<math>\beta</math></i>   | ACAGAATATCAACCAACAAGTGATATTCTC | GATTCTTTCCTTTGAGGCCCA         |
| <i>Il-6</i>                     | ATCCAGTTGCCTTCTTGGGACTGA       | TAAGCCTCCGACTGTGAAGTGGT       |
| <i>Tgf-<math>\beta</math>1</i>  | CAGTGGCTGAACCAAAGGAGACGG       | CCCCGACGTTTGGGGCTGATC         |
| <i>Tnf-<math>\alpha</math></i>  | TCGGGGTGATCGGTCCCAA            | TGGTTTGCTACGACGTGGGCT         |
| <i>TrkA</i>                     | CTCCTTCTCGCCAGTGGAC            | TGCCCTCAGTAGGGGAAAGA          |
| <i>TrkB</i>                     | CGTCACTTCGCCAGCCAGCAGTAG       | CTATACGCCAGGCACCACTC          |
| <i><math>\beta</math>-actin</i> | CAACGAGCGGTTCCGAT              | GCCACAGGTTCCATACCA            |
